# Supplementary material for: Concurrent epidermal growth factor receptor T790M secondary mutation and epithelial‐mesenchymal transition in a lung adenocarcinoma patient with EGFR‐TKI drug resistance
Source: PubMed Central journal article supplement — Thorac Cancer. 2017 Aug 8;8(6):693–7. doi: 10.1111/1759-7714.12484 (PMC5668506; doi:10.1111/1759-7714.12484), 2017-08-08
Supplement: TCA-8-693-s001.pdf [file TCA-8-693-s001.pdf]

|         |          |         |         |        |         |        |         |         |          |
|---------|----------|---------|---------|--------|---------|--------|---------|---------|----------|
| ABL1    | BRAF     | CHEK2   | ETV4    | FGFR4  | JAK2    | MRE11A | PALB2   | RAD51D  | STAG2    |
| AKT1    | BRCA1    | CHUK    | ETV5    | FLT1   | JAK3    | MSH2   | PARP1   | RAD52   | STAT4    |
| AKT2    | BRCA2    | CIC     | ETV6    | FLT3   | JUN     | MSH6   | PARP2   | RAD54L  | STK11    |
| AKT3    | BRIP1    | CRBN    | EWSR1   | FLT4   | KDM5A   | MTOR   | PARP3   | RAF1    | SUFU     |
| ALK     | BTG1     | CREBBP  | EZH2    | FOXL2  | KDM5C   | MUTYH  | PARP4   | RARA    | SYK      |
| ALOX12B | BTK      | CRKL    | FAM123B | GATA1  | KDM6A   | MYC    | PAX5    | RB1     | TBX3     |
| APC     | C11ORF30 | CRLF2   | FAM46C  | GATA2  | KDR     | MYCL1  | PBRM1   | REL     | TET2     |
| APCDD1  | C17ORF39 | CSF1R   | FANCA   | GATA3  | KEAP1   | MYCN   | PDGFRA  | RET     | TGFB2    |
| AR      | CARD11   | CTCF    | FANCC   | GNA11  | KIT     | MYD88  | PDGFRB  | RICTOR  | TIPARP   |
| ARAF    | CASP8    | CTNNA1  | FANCD2  | GNA13  | KLHL6   | MYST3  | PDK1    | RNF43   | TMPRSS2  |
| ARFRP1  | CBFB     | CTNNB1  | FANCE   | GNAQ   | KRAS    | NBN    | PIK3C2G | RPA1    | TNFAIP3  |
| ARID1A  | CBL      | CUL4A   | FANCF   | GNAS   | LMO1    | NCOR1  | PIK3C3  | RPTOR   | TNFRSF14 |
| ARID2   | CCND1    | CUL4B   | FANCG   | GPR124 | LRP1B   | NF1    | PIK3CA  | ROS1    | TOP1     |
| ASXL1   | CCND2    | CYP17A1 | FANCI   | GRIN2A | MAP2K1  | NF2    | PIK3CG  | RUNX1   | TP53     |
| ATM     | CCND3    | DAXX    | FANCL   | GSK3B  | MAP2K2  | NFE2L2 | PIK3R1  | RUNX1T1 | TRRAP    |
| ATR     | CCNE1    | DDR2    | FANCM   | HGF    | MAP2K4  | NFKBIA | PIK3R2  | SETD2   | TSC1     |
| ATRX    | CD79A    | DIS3    | FAT3    | HLA-A  | MAP3K1  | NKX2-1 | PMS2    | SF3B1   | TSC2     |
| AURKA   | CD79B    | DNMT3A  | FBXW7   | HRAS   | MAP3K13 | NOTCH1 | PNRC1   | SH2B3   | TSHR     |
| AURKB   | CDC73    | DOT1L   | FGF10   | IDH1   | MCL1    | NOTCH2 | PPP2R1A | SMAD2   | VHL      |
| AXL     | CDH1     | EGFR    | FGF12   | IDH2   | MDM2    | NOTCH3 | PRDM1   | SMAD4   | WISP3    |
| BACH1   | CDK12    | EP300   | FGF14   | IGF1   | MDM4    | NOTCH4 | PRKAR1A | SMARCA4 | WT1      |
| BAP1    | CDK4     | EPHA3   | FGF19   | IGF1R  | MED12   | NPM1   | PRKDC   | SMARCB1 | XPO1     |
| BARD1   | CDK6     | EPHA5   | FGF23   | IGF2   | MEF2B   | NRAS   | PRSS8   | SMARCD1 | XRCC3    |
| BCL2    | CDK8     | EPHB1   | FGF3    | IKBKE  | MEN1    | NSD1   | PTCH1   | SMO     | ZNF217   |
| BCL2L2  | CDKN1B   | ERBB2   | FGF4    | IKZF1  | MET     | NTRK1  | PTEN    | SOCS1   | ZNF703   |
| BCL6    | CDKN2A   | ERBB3   | FGF6    | IL7R   | MITF    | NTRK2  | PTPN11  | SOX10   |          |
| BCOR    | CDKN2B   | ERBB4   | FGF7    | INHBA  | MLH1    | NTRK3  | RAD50   | SOX2    |          |
| BCORL1  | CDKN2C   | ERG     | FGFR1   | IRF4   | MLL     | NUP93  | RAD51   | SPEN    |          |

BCR  
BLM

CEBPA  
CHEK1

ESR1  
ETV1

FGFR2  
FGFR3

IRS2  
JAK1

MLL2  
MPL

PAK3  
PAK7

RAD51B  
RAD51C

SPOP  
SRC

### Color Code

|                                                                                     |                      |
|-------------------------------------------------------------------------------------|----------------------|
|  | Mutation             |
|  | Amplification        |
|  | Fusion/Translocation |
